# Supplementary material
Source: ML conference proceedings conference paper supplement (https://aclanthology.org/2021.naacl-main.300)
Supplement: OptionalSupplementaryData [file 2021.naacl-main.300.OptionalSupplementaryData.zip]

# APPENDIX: Topic Model or Topic Twaddle? Re-evaluating Semantic Interpretability Measures

Caitlin Doogan and Wray Buntine

NAACL-HLT 2021

## A Examples of tasks for Qualitative Experiments

### Topic word-set labeling

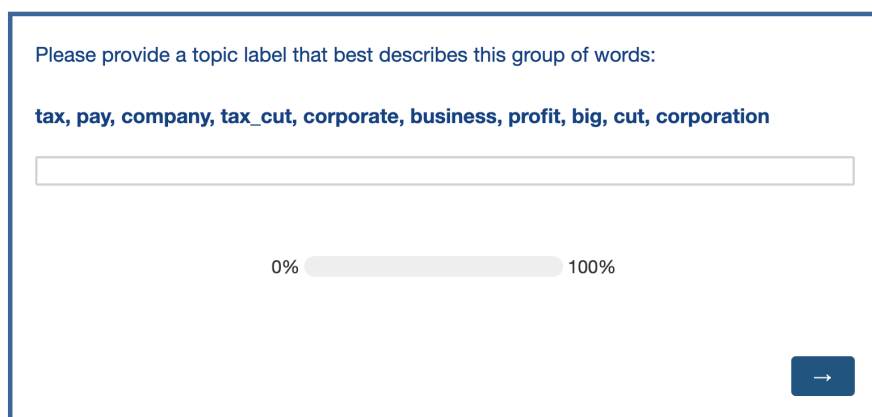

Please provide a topic label that best describes this group of words:

**tax, pay, company, tax\_cut, corporate, business, profit, big, cut, corporation**

0%  100%

Figure 2: Example of topic word-set labeling task. Topic 40 from AP modeled on LDA.

## Topic document-collection labeling

|                                                                                                                                                                                                                 |
|-----------------------------------------------------------------------------------------------------------------------------------------------------------------------------------------------------------------|
| @ScottMorrisonMP @KellyODwyer #Budget2018 #Auspol have a read. No benefits to company tax cuts                                                                                                                  |
| ...and not increasing executive salaries or share buybacks. #TaxCuts #auspol                                                                                                                                    |
| Can anyone explain who RTPDS Aus Pty Ltd is and how out of \$14,000,000,000 (\$14B if you can't keep up with the zeros) taxable income they paid only \$6,375 in corporate tax? Is that even possible?? #auspol |
| @SwannyQLD why should multinationals and corporations that pay ZERO tax get a tax cut? #Insiders #AskingForAFriend #auspol                                                                                      |
| Corp tax cuts, just another gift, nothing to do with stimulating the economy, especially when so many don't even pay tax as it is. #auspol                                                                      |
| #Fukushima #auspol AVOID #thorium #nuclear SHILLS John Quakes Quade Malloys Gus Rawles Leo Sutton Marcelina Thomas Hypermetropia                                                                                |
| #auspol Profits up 25% wages up 0% ... give my corporation a tax cut!!!. via @watoday                                                                                                                           |
| So Treasurer, tell us again how a tax cut for corporations who don't pay tax anyway will mean they will increase salaries. #auspol                                                                              |
| Cut out the corporate tax cuts and do not even give them trickle #auspol                                                                                                                                        |
| Well how else could they afford to pay him so much if they had to pay tax and workers as well!! #auspol                                                                                                         |

Please provide a topic label that best describes the collection of tweets above.

Your label should describe a central theme, concept, event, or other unifying feature of the collection. If one or more tweets do not align with a label that is suitable to describe all other tweets, then you may disregard them.

You may click on the tweet to see it in context.

If you cannot identify an appropriate label, please enter 'NA'.

0%  100%

→

Figure 3: Example of topic document-collection labeling task. Only the top 10 tweets have been shown for brevity.

## Difficulty of topic document-collection labeling

Please rate how difficult was it to identify a central theme, concept, event, or other unifying feature of the the collection above, and then provide a descriptive label for this?

Your answer should reflect how coherent the collection was, not the complexity of the concept.

- ☐ Extremely easy
- ☐ Neither easy nor difficult
- ☐ Difficult
- ☐ I could not label the collection and wrote 'NA'

0% 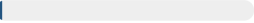 100%

 

Figure 4: Example question asking SME to rate how difficult it was to label a topic document-collection.

## Topic word-set and topic document-collection label alignment

Please rate how aligned the following topic-wordset label to the topic-document collection label?

**Identical:** Labels are nearly identical or synonymous.  
*Example:* Dual citizenship crisis AND Section 44 crisis.

**Closely Aligned:** Labels are related but describe different aspects of the matter.  
*Example:* Change-the-date campaign AND Australia Day debate.

**Somewhat Aligned:** The topic label is very general acting as a category the collection label would fit under.  
*Example:* Political scandal AND Politicians extramarital affairs.

**Loosely Aligned:** Labels are related, but the topic label does not accurately describe the document collection.  
*Example:* Adani coal mine AND Anti-fracking protests.

**Not Aligned:** The labels are not aligned.  
*Example:* Racial Vilification AND Climate Change

Note that common words or synonyms which are contextually dissimilar do not align topics.

|                                                   | Not Aligned           | Loosely Aligned       | Somewhat Aligned      | Closely Aligned       | Identical             |
|---------------------------------------------------|-----------------------|-----------------------|-----------------------|-----------------------|-----------------------|
| Election AND Opinion Poll results                 | <input type="radio"/> |
| Climate Science AND Arctic warming                | <input type="radio"/> |
| Media AND Investigative Journalism                | <input type="radio"/> |
| Industrial Relations AND Train driver strikes     | <input type="radio"/> |
| National Identity AND Republican movement         | <input type="radio"/> |
| Addiction services AND Cannabis decriminalisation | <input type="radio"/> |

0% 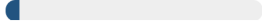 100%

[<](#) [>](#)

Figure 5: Example question asking SME to rate how aligned a topic word-set label was to topic document-collection label.

## B Evaluation 1: Coherence Measures

### Pearson’s correlation coefficients between paired coherence measures

| LDA<br>AP                        | 10     |        | 20     |        | 40     |        | 60     |        |
|----------------------------------|--------|--------|--------|--------|--------|--------|--------|--------|
|                                  | $\rho$ | $p$    | $\rho$ | $p$    | $\rho$ | $p$    | $\rho$ | $p$    |
| $C_{NPMI}$ and $C_{NPMI-ABC}$    | 0.671  | 0.034  | 0.749  | < 0.01 | 0.762  | < 0.01 | 0.727  | < 0.01 |
| $C_{NPMI}$ and $C_{U_{mass}}$    | 0.661  | 0.037  | 0.752  | < 0.01 | 0.579  | < 0.01 | 0.447  | < 0.01 |
| $C_{NPMI}$ and $C_{NPMI-AP}$     | 0.383  | 0.275  | 0.394  | 0.086  | 0.258  | 0.108  | 0.256  | 0.048  |
| $C_{NPMI}$ and $C_P$             | 0.897  | < 0.01 | 0.912  | < 0.01 | 0.919  | < 0.01 | 0.878  | < 0.01 |
| $C_{NPMI}$ and $C_A$             | 0.692  | 0.027  | 0.523  | 0.018  | 0.547  | < 0.01 | 0.556  | < 0.01 |
| $C_{NPMI}$ and $C_V$             | 0.127  | 0.726  | 0.117  | 0.624  | -0.071 | 0.663  | 0.089  | 0.498  |
| $C_{NPMI-ABC}$ and $C_{NPMI-AP}$ | 0.538  | 0.109  | 0.541  | 0.014  | 0.343  | 0.030  | 0.375  | 0.003  |

  

| MetaLDA<br>AP                    | 10     |        | 20     |        | 40     |        | 60     |        |
|----------------------------------|--------|--------|--------|--------|--------|--------|--------|--------|
|                                  | $\rho$ | $p$    | $\rho$ | $p$    | $\rho$ | $p$    | $r_p$  | $p$    |
| $C_{NPMI}$ and $C_{NPMI-ABC}$    | 0.778  | 0.008  | 0.783  | < 0.01 | 0.625  | < 0.01 | 0.651  | < 0.01 |
| $C_{NPMI}$ and $C_{U_{mass}}$    | 0.834  | 0.003  | 0.738  | < 0.01 | 0.715  | < 0.01 | 0.590  | < 0.01 |
| $C_{NPMI}$ and $C_{NPMI-AP}$     | 0.523  | 0.121  | 0.096  | 0.686  | -0.084 | 0.606  | 0.005  | 0.972  |
| $C_{NPMI}$ and $C_P$             | 0.929  | < 0.01 | 0.959  | < 0.01 | 0.949  | < 0.01 | 0.923  | < 0.01 |
| $C_{NPMI}$ and $C_A$             | 0.788  | 0.007  | 0.435  | 0.055  | 0.623  | < 0.01 | 0.505  | < 0.01 |
| $C_{NPMI}$ and $C_V$             | -0.471 | 0.170  | -0.078 | 0.742  | -0.284 | 0.075  | -0.145 | 0.269  |
| $C_{NPMI-ABC}$ and $C_{NPMI-AP}$ | 0.100  | 0.784  | 0.190  | 0.423  | 0.125  | 0.443  | 0.172  | 0.188  |

Table 3: Pearson’s  $r$  and  $p$ -values reported for the analysis of correlations between coherence measures for the AP dataset

### Aggregate mean for coherence measures

| LDA                              | AP          | AWH          | AWM         |
|----------------------------------|-------------|--------------|-------------|
| $C_{NPMI}$ and $C_{NPMI-ABC}$    | 0.727±0.040 | 0.719±0.050  | 0.769±0.115 |
| $C_{NPMI}$ and $C_{U_{mass}}$    | 0.601±0.129 | 0.395±0.406  | 0.419±0.088 |
| $C_{NPMI}$ and $C_{NPMI-AP}$     | 0.323±0.076 | 0.507±0.189  | 0.387±0.123 |
| $C_{NPMI}$ and $C_P$             | 0.902±0.018 | 0.779±0.101  | 0.855±0.043 |
| $C_{NPMI}$ and $C_A$             | 0.578±0.076 | 0.391±0.094  | 0.626±0.069 |
| $C_{NPMI}$ and $C_V$             | 0.066±0.092 | -0.108±0.053 | 0.253±0.118 |
| $C_{NPMI-ABC}$ and $C_{NPMI-AP}$ | 0.449±0.105 | 0.565±0.056  | 0.423±0.073 |

  

| MetaLDA                          | AP           | AWH          | AWM         |
|----------------------------------|--------------|--------------|-------------|
| $C_{NPMI}$ and $C_{NPMI-ABC}$    | 0.709±0.083  | 0.606±0.126  | 0.716±0.104 |
| $C_{NPMI}$ and $C_{U_{mass}}$    | 0.719±0.100  | 0.539±0.086  | 0.272±0.249 |
| $C_{NPMI}$ and $C_{NPMI-AP}$     | 0.135±0.269  | 0.258±0.267  | 0.181±0.153 |
| $C_{NPMI}$ and $C_P$             | 0.940±0.017  | 0.770±0.149  | 0.884±0.037 |
| $C_{NPMI}$ and $C_A$             | 0.588±0.154  | 0.360±0.183  | 0.285±0.187 |
| $C_{NPMI}$ and $C_V$             | -0.245±0.174 | -0.138±0.273 | 0.087±0.217 |
| $C_{NPMI-ABC}$ and $C_{NPMI-AP}$ | 0.147±0.042  | 0.362±0.223  | 0.390±0.159 |

Table 6: The aggregate mean Pearson’s correlation coefficient for LDA and MetaLDA across all topics.

| LDA<br>AWH                       | 10     |       | 20     |        | 40     |        | 60     |        |
|----------------------------------|--------|-------|--------|--------|--------|--------|--------|--------|
|                                  | $\rho$ | $p$   | $\rho$ | $p$    | $\rho$ | $p$    | $\rho$ | $p$    |
| $C_{NPMI}$ and $C_{NPMI-ABC}$    | 0.794  | 0.006 | 0.702  | 0.01   | 0.693  | < 0.01 | 0.688  | < 0.01 |
| $C_{NPMI}$ and $C_{Umass}$       | 0.714  | 0.020 | -0.193 | 0.414  | 0.454  | 0.003  | 0.606  | < 0.01 |
| $C_{NPMI}$ and $C_{NPMI-AP}$     | 0.746  | 0.013 | 0.545  | 0.013  | 0.438  | 0.005  | 0.297  | 0.021  |
| $C_{NPMI}$ and $C_P$             | 0.628  | 0.052 | 0.816  | < 0.01 | 0.846  | < 0.01 | 0.826  | < 0.01 |
| $C_{NPMI}$ and $C_A$             | 0.315  | 0.375 | 0.316  | 0.174  | 0.421  | 0.007  | 0.511  | < 0.01 |
| $C_{NPMI}$ and $C_V$             | -0.093 | 0.798 | -0.176 | 0.459  | -0.112 | 0.490  | -0.049 | 0.709  |
| $C_{NPMI-ABC}$ and $C_{NPMI-AP}$ | 0.586  | 0.075 | 0.619  | 0.004  | 0.567  | < 0.01 | 0.488  | < 0.01 |

  

| MetaLDA<br>AWH                   | 10     |       | 20     |        | 40     |        | 60     |        |
|----------------------------------|--------|-------|--------|--------|--------|--------|--------|--------|
|                                  | $\rho$ | $p$   | $\rho$ | $p$    | $\rho$ | $p$    | $r_p$  | $p$    |
| $C_{NPMI}$ and $C_{NPMI-ABC}$    | 0.719  | 0.019 | 0.613  | 0.004  | 0.428  | 0.006  | 0.663  | < 0.01 |
| $C_{NPMI}$ and $C_{Umass}$       | 0.593  | 0.071 | 0.459  | 0.042  | 0.473  | 0.002  | 0.631  | < 0.01 |
| $C_{NPMI}$ and $C_{NPMI-AP}$     | 0.450  | 0.192 | 0.476  | 0.034  | 0.204  | 0.208  | -0.098 | 0.458  |
| $C_{NPMI}$ and $C_P$             | 0.547  | 0.102 | 0.844  | < 0.01 | 0.855  | < 0.01 | 0.835  | < 0.01 |
| $C_{NPMI}$ and $C_A$             | 0.089  | 0.808 | 0.407  | 0.075  | 0.469  | 0.002  | 0.476  | < 0.01 |
| $C_{NPMI}$ and $C_V$             | 0.034  | 0.925 | -0.491 | 0.028  | 0.115  | 0.479  | -0.209 | 0.108  |
| $C_{NPMI-ABC}$ and $C_{NPMI-AP}$ | 0.489  | 0.151 | 0.580  | 0.007  | 0.303  | 0.058  | 0.076  | 0.565  |

Table 4: Pearson’s  $r$  and  $p$ -values reported for the analysis of coherence measures correlations for the AWH dataset

### Graphs of aggregate coherence measures for LDA vs MetaLDA

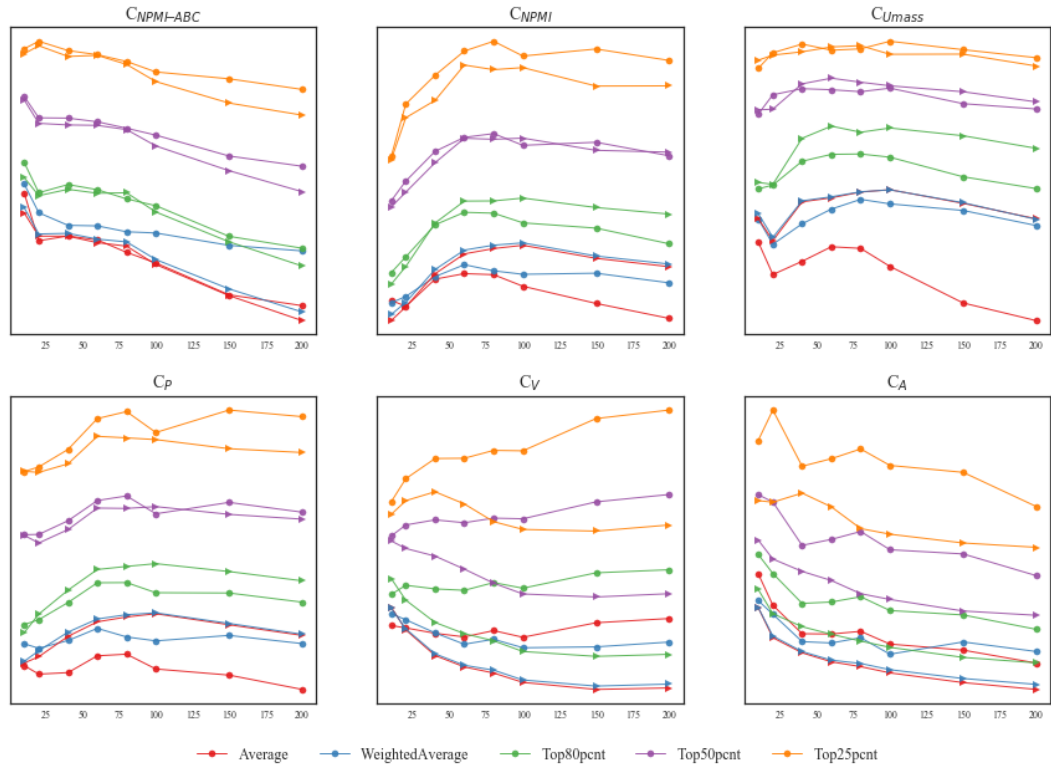

Figure 6: Comparison of LDA (triangle) and MetaLDA (circle) aggregated coherence scores for the AWH dataset. Scores are shown on the y-axis and  $K$  is shown on the x-axis.

| LDA<br>AWM                       | 10     |        | 20     |        | 40     |        | 60    |        |
|----------------------------------|--------|--------|--------|--------|--------|--------|-------|--------|
|                                  | $\rho$ | $p$    | $\rho$ | $p$    | $\rho$ | $p$    | $r_p$ | $p$    |
| $C_{NPMI}$ and $C_{NPMI-ABC}$    | 0.894  | < 0.01 | 0.821  | < 0.01 | 0.734  | < 0.01 | 0.627 | < 0.01 |
| $C_{NPMI}$ and $C_{Umass}$       | 0.512  | 0.131  | 0.450  | 0.047  | 0.303  | 0.058  | 0.410 | < 0.01 |
| $C_{NPMI}$ and $C_{NPMI-AP}$     | 0.294  | 0.409  | 0.389  | 0.090  | 0.560  | < 0.01 | 0.304 | 0.018  |
| $C_{NPMI}$ and $C_P$             | 0.898  | < 0.01 | 0.886  | < 0.01 | 0.816  | < 0.01 | 0.821 | < 0.01 |
| $C_{NPMI}$ and $C_A$             | 0.725  | 0.018  | 0.584  | 0.007  | 0.620  | < 0.01 | 0.576 | < 0.01 |
| $C_{NPMI}$ and $C_V$             | 0.341  | 0.335  | 0.105  | 0.660  | 0.354  | 0.025  | 0.210 | 0.108  |
| $C_{NPMI-ABC}$ and $C_{NPMI-AP}$ | 0.364  | 0.301  | 0.391  | 0.088  | 0.528  | < 0.01 | 0.407 | < 0.01 |

  

| MetaLDA<br>AWM                   | 10     |        | 20     |        | 40     |        | 60     |        |
|----------------------------------|--------|--------|--------|--------|--------|--------|--------|--------|
|                                  | $\rho$ | $p$    | $\rho$ | $p$    | $\rho$ | $p$    | $\rho$ | $p$    |
| $C_{NPMI}$ and $C_{NPMI-ABC}$    | 0.866  | < 0.01 | 0.687  | 0.001  | 0.684  | < 0.01 | 0.625  | < 0.01 |
| $C_{NPMI}$ and $C_{Umass}$       | 0.302  | 0.396  | -0.080 | 0.736  | 0.500  | 0.001  | 0.366  | < 0.01 |
| $C_{NPMI}$ and $C_{NPMI-AP}$     | 0.289  | 0.418  | 0.133  | 0.576  | 0.315  | 0.048  | -0.015 | 0.912  |
| $C_{NPMI}$ and $C_P$             | 0.939  | < 0.01 | 0.860  | < 0.01 | 0.861  | < 0.01 | 0.875  | < 0.01 |
| $C_{NPMI}$ and $C_A$             | 0.080  | 0.825  | 0.333  | 0.151  | 0.207  | 0.201  | 0.518  | < 0.01 |
| $C_{NPMI}$ and $C_V$             | -0.109 | 0.765  | 0.384  | 0.094  | -0.033 | 0.839  | 0.105  | 0.425  |
| $C_{NPMI-ABC}$ and $C_{NPMI-AP}$ | 0.417  | 0.231  | 0.516  | 0.020  | 0.469  | 0.002  | 0.160  | 0.222  |

Table 5: Pearson’s  $r$  and  $p$ -values reported for the analysis of correlations between coherence measures for the AWM dataset

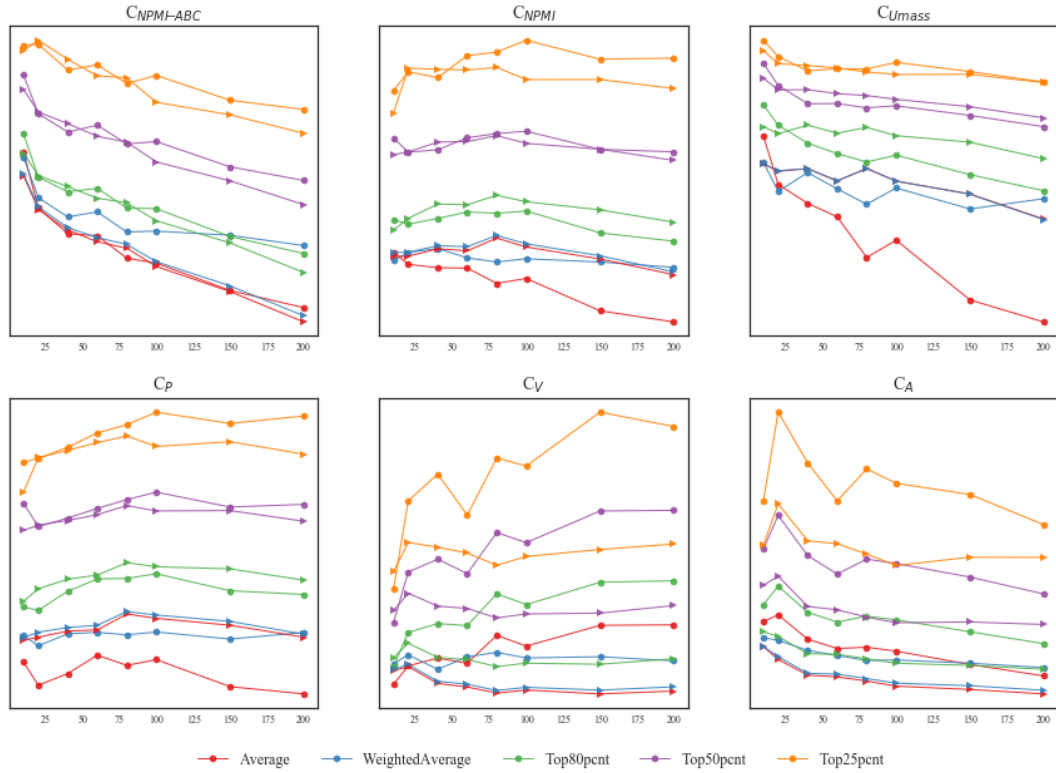

Figure 7: Comparison of LDA (triangle) and MetaLDA (circle) aggregated coherence scores for the AWM dataset. Scores are shown on the y-axis and  $K$  is shown on the x-axis.

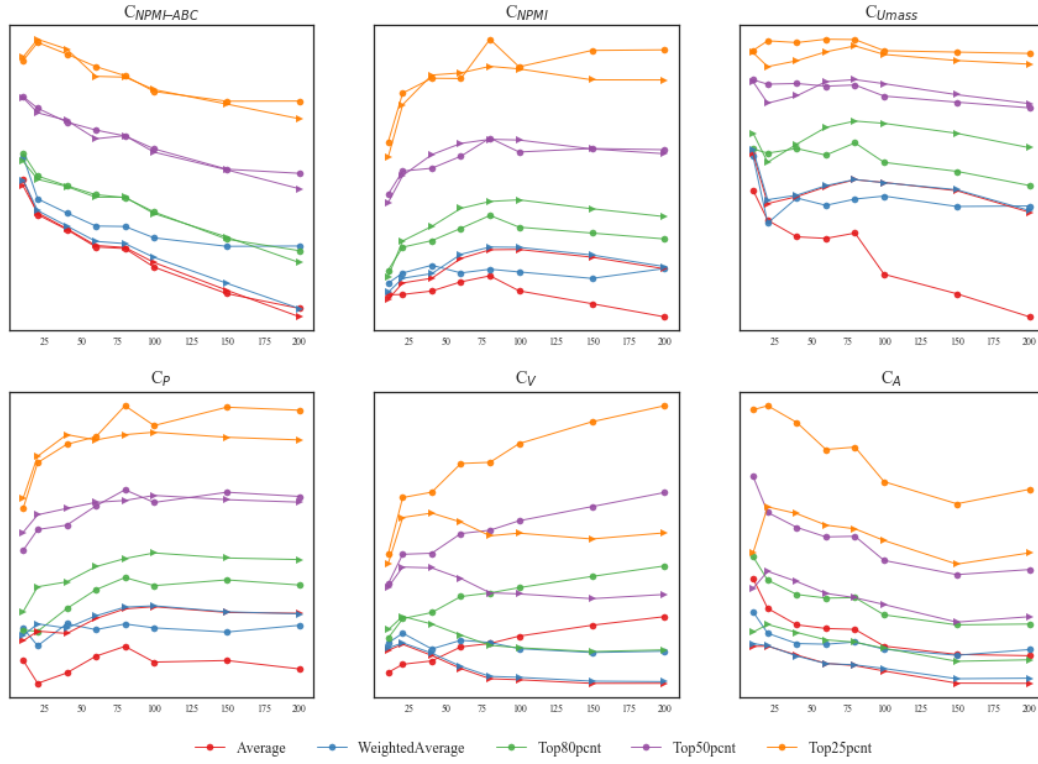

Figure 8: Comparison of LDA (triangle) and MetaLDA (circle) aggregated coherence scores for the AWHM dataset. Scores are shown on the y-axis and  $K$  is shown on the x-axis.

## C Evaluation 2: Labeling Topics

The Spearman's  $\rho$  correlation coefficients for pairwise combinations of  $Q_{(nbr)}$  and coherence measures for all learned models.



| <b>LDA<br/>AP</b>     | 10     |       | 20     |        | 40     |        | 60     |        |
|-----------------------|--------|-------|--------|--------|--------|--------|--------|--------|
|                       | $\rho$ | $p$   | $\rho$ | $p$    | $\rho$ | $p$    | $\rho$ | $p$    |
| $C_{NPMI}$            | 0.058  | 0.873 | 0.264  | 0.261  | 0.144  | 0.374  | -0.165 | 0.209  |
| $C_{NPMI-ABC}$        | 0.522  | 0.122 | 0.379  | 0.099  | 0.245  | 0.128  | -0.038 | 0.774  |
| $C_{Umass}$           | 0.522  | 0.122 | 0.104  | 0.663  | -0.022 | 0.892  | -0.384 | < 0.01 |
| $C_{NPMI-AP}$         | 0.406  | 0.244 | 0.626  | 0.003  | 0.638  | < 0.01 | 0.217  | 0.096  |
| $C_P$                 | 0.174  | 0.631 | 0.355  | 0.125  | 0.245  | 0.128  | -0.062 | 0.636  |
| $C_A$                 | 0.406  | 0.244 | 0.409  | 0.073  | 0.383  | 0.015  | 0.246  | 0.058  |
| $C_V$                 | 0.058  | 0.873 | 0.138  | 0.562  | 0.254  | 0.114  | 0.472  | < 0.01 |
| $D_{tp}$              | -0.174 | 0.631 | 0.046  | 0.846  | 0.017  | 0.919  | 0.056  | 0.671  |
| $D_{ew}$              | -0.522 | 0.122 | -0.814 | < 0.01 | -0.535 | < 0.01 | -0.223 | 0.087  |
| <b>MetaLDA<br/>AP</b> | 10     |       | 20     |        | 40     |        | 60     |        |
|                       | $\rho$ | $p$   | $\rho$ | $p$    | $\rho$ | $p$    | $\rho$ | $p$    |
| $C_{NPMI}$            | 0.623  | 0.054 | -0.069 | 0.774  | 0.253  | 0.115  | 0.336  | < 0.01 |
| $C_{NPMI-ABC}$        | 0.337  | 0.340 | 0.096  | 0.686  | 0.098  | 0.547  | 0.403  | < 0.01 |
| $C_{Umass}$           | 0.623  | 0.054 | -0.302 | 0.195  | 0.099  | 0.544  | 0.348  | < 0.01 |
| $C_{NPMI-AP}$         | 0.450  | 0.192 | 0.054  | 0.822  | 0.220  | 0.172  | 0.329  | 0.010  |
| $C_P$                 | 0.623  | 0.054 | -0.088 | 0.714  | 0.339  | 0.032  | 0.307  | 0.017  |
| $C_A$                 | 0.701  | 0.024 | -0.022 | 0.927  | 0.600  | < 0.01 | 0.304  | 0.018  |
| $C_V$                 | -0.545 | 0.103 | 0.320  | 0.169  | 0.172  | 0.289  | 0.118  | 0.371  |
| $D_{tp}$              | 0.078  | 0.831 | -0.250 | 0.288  | 0.069  | 0.670  | 0.230  | 0.077  |
| $D_{ew}$              | -0.017 | 0.962 | -0.211 | 0.372  | -0.082 | 0.616  | -0.099 | 0.45   |

Table 7: Spearman’s  $\rho$  and  $p$ -values reported for the analysis of correlations between coherence measures and  $Q_{(nbr)}$  for the AP dataset

| <b>LDA<br/>AWH</b>     | 10     |       | 20     |        | 40     |        | 60     |        |
|------------------------|--------|-------|--------|--------|--------|--------|--------|--------|
|                        | $\rho$ | $p$   | $\rho$ | $p$    | $\rho$ | $p$    | $\rho$ | $p$    |
| $C_{NPMI}$             | 0.000  | nan   | 0.371  | 0.107  | -0.045 | 0.784  | 0.101  | 0.441  |
| hline $C_{NPMI-ABC}$   | 0.000  | nan   | 0.328  | 0.158  | 0.160  | 0.325  | 0.181  | 0.165  |
| $C_{Umass}$            | 0.000  | nan   | -0.280 | 0.232  | -0.078 | 0.634  | -0.003 | 0.980  |
| $C_{NPMI-AP}$          | 0.000  | nan   | 0.182  | 0.443  | 0.355  | 0.025  | 0.216  | 0.097  |
| $C_P$                  | 0.000  | nan   | 0.375  | 0.104  | -0.016 | 0.921  | 0.066  | 0.615  |
| $C_A$                  | 0.000  | nan   | 0.103  | 0.665  | 0.179  | 0.270  | 0.319  | 0.013  |
| $C_V$                  | 0.000  | nan   | 0.043  | 0.857  | 0.192  | 0.235  | 0.235  | 0.071  |
| $D_{tp}$               | 0.000  | nan   | -0.131 | 0.581  | 0.024  | 0.884  | 0.193  | 0.140  |
| $D_{ew}$               | 0.000  | nan   | -0.589 | < 0.01 | -0.345 | 0.029  | -0.157 | 0.230  |
| <b>MetaLDA<br/>AWH</b> | 10     |       | 20     |        | 40     |        | 60     |        |
|                        | $\rho$ | $p$   | $\rho$ | $p$    | $\rho$ | $p$    | $\rho$ | $p$    |
| $C_{NPMI}$             | -0.522 | 0.122 | 0.074  | 0.758  | -0.051 | 0.753  | 0.394  | < 0.01 |
| $C_{NPMI-ABC}$         | -0.406 | 0.244 | 0.217  | 0.357  | 0.401  | 0.010  | 0.305  | 0.018  |
| $C_{Umass}$            | -0.290 | 0.416 | 0.127  | 0.594  | -0.039 | 0.813  | 0.297  | 0.021  |
| $C_{NPMI-AP}$          | -0.174 | 0.631 | 0.676  | < 0.01 | 0.490  | < 0.01 | 0.011  | 0.934  |
| $C_P$                  | -0.522 | 0.122 | -0.031 | 0.897  | -0.087 | 0.595  | 0.392  | < 0.01 |
| $C_A$                  | -0.406 | 0.244 | 0.322  | 0.166  | 0.240  | 0.135  | 0.404  | < 0.01 |
| $C_V$                  | 0.290  | 0.416 | -0.088 | 0.713  | 0.338  | 0.033  | -0.013 | 0.920  |
| $D_{tp}$               | 0.174  | 0.631 | 0.200  | 0.399  | 0.132  | 0.417  | 0.321  | 0.0120 |
| $D_{ew}$               | 0.058  | 0.873 | -0.255 | 0.279  | -0.374 | 0.017  | -0.049 | 0.708  |

Table 8: Spearman’s  $\rho$  and  $p$ -values reported for the analysis of correlations between coherence measures and  $Q_{(nbr)}$  for the AWH dataset

| <b>LDA</b>     | 10        |           | 20        |             | 40        |           | 60        |           |
|----------------|-----------|-----------|-----------|-------------|-----------|-----------|-----------|-----------|
| <b>AWM</b>     | $\rho, p$ | $\rho, p$ | $\rho, p$ | $\rho, p$   | $\rho, p$ | $\rho, p$ | $\rho, p$ | $\rho, p$ |
| $C_{NPMI}$     | 0.142     | 0.696     | -0.039    | 0.871       | 0.092     | 0.573     | 0.014     | 0.914     |
| $C_{NPMI-ABC}$ | 0.321     | 0.366     | 0.063     | 0.792       | 0.141     | 0.386     | 0.207     | 0.112     |
| $C_{Umass}$    | -0.142    | 0.696     | 0.015     | 0.952       | 0.083     | 0.609     | -0.314    | 0.015     |
| $C_{NPMI-AP}$  | 0.321     | 0.366     | 0.285     | 0.223       | 0.323     | 0.042     | 0.295     | 0.022     |
| $C_P$          | 0.306     | 0.390     | -0.119    | 0.619       | -0.007    | 0.968     | -0.045    | 0.730     |
| $C_A$          | 0.350     | 0.321     | -0.056    | 0.816       | 0.237     | 0.140     | 0.286     | 0.027     |
| $C_V$          | 0.634     | 0.049     | -0.099    | 0.677 0.149 | 0.357     | 0.228     | 0.080     |           |
| $D_{tp}$       | 0.007     | 0.984     | 0.312     | 0.180       | 0.059     | 0.719     | 0.432     | < 0.01    |
| $D_{ew}$       | -0.500    | 0.141     | -0.508    | 0.022       | -0.408    | 0.009     | -0.203    | 0.120     |

  

| <b>MetaLDA</b> | 10     |       | 20     |       | 40     |        | 60     |        |
|----------------|--------|-------|--------|-------|--------|--------|--------|--------|
| <b>AWM</b>     | $\rho$ | $p$   | $\rho$ | $p$   | $\rho$ | $p$    | $\rho$ | $p$    |
| $C_{NPMI}$     | 0.151  | 0.678 | 0.187  | 0.429 | 0.492  | < 0.01 | 0.407  | < 0.01 |
| $C_{NPMI-ABC}$ | 0.243  | 0.499 | -0.002 | 0.993 | 0.228  | 0.158  | 0.159  | 0.224  |
| $C_{Umass}$    | 0.125  | 0.732 | -0.289 | 0.216 | -0.067 | 0.680  | -0.015 | 0.908  |
| $C_{NPMI-AP}$  | 0.321  | 0.365 | -0.099 | 0.678 | -0.055 | 0.734  | 0.047  | 0.721  |
| $C_P$          | 0.282  | 0.430 | 0.153  | 0.520 | 0.527  | < 0.01 | 0.481  | < 0.01 |
| $C_A$          | -0.164 | 0.651 | -0.085 | 0.722 | 0.053  | 0.747  | 0.267  | 0.039  |
| $C_V$          | -0.164 | 0.651 | 0.332  | 0.153 | 0.053  | 0.745  | 0.220  | 0.091  |
| $D_{tp}$       | 0.085  | 0.815 | 0.004  | 0.986 | 0.594  | < 0.01 | 0.372  | < 0.01 |
| $D_{ew}$       | -0.125 | 0.732 | -0.040 | 0.868 | 0.274  | 0.087  | 0.224  | 0.085  |

Table 9: Spearman’s  $\rho$  and  $p$ -values reported for the analysis of correlations between coherence measures and  $Q_{(nbr)}$ , for the AWM dataset

## D Evaluation 3: Topic Label Agreement

### Inter-coder Reliability results

| Kripp.<br>alpha | 10    |       | 20    |       | 40    |       | 60    |       |
|-----------------|-------|-------|-------|-------|-------|-------|-------|-------|
|                 | LDA   | Meta  | LDA   | Meta  | LDA   | Meta  | LDA   | Meta  |
| AP              | 0.398 | 0.363 | 0.250 | 0.361 | 0.402 | 0.361 | 0.584 | 0.486 |
| AWH             | 0.283 | 0.391 | 0.294 | 0.327 | 0.368 | 0.405 | 0.512 | 0.498 |
| AWM             | 0.267 | 0.344 | 0.323 | 0.322 | 0.366 | 0.361 | 0.513 | 0.447 |
| Fleiss<br>kappa | 10    |       | 20    |       | 40    |       | 60    |       |
|                 | LDA   | Meta  | LDA   | Meta  | LDA   | Meta  | LDA   | Meta  |
| AP              | 0.387 | 0.363 | 0.156 | 0.332 | 0.411 | 0.344 | 0.578 | 0.485 |
| AWH             | 0.265 | 0.406 | 0.290 | 0.305 | 0.381 | 0.371 | 0.527 | 0.515 |
| AWM             | 0.258 | 0.394 | 0.321 | 0.353 | 0.362 | 0.356 | 0.535 | 0.492 |
| $Q_{agr}$       | 10    |       | 20    |       | 40    |       | 60    |       |
|                 | LDA   | Meta  | LDA   | Meta  | LDA   | Meta  | LDA   | Meta  |
| AP              | 0.417 | 0.433 | 0.167 | 0.292 | 0.342 | 0.283 | 0.503 | 0.492 |
| AWH             | 0.283 | 0.400 | 0.258 | 0.258 | 0.286 | 0.296 | 0.439 | 0.411 |
| AWM             | 0.217 | 0.250 | 0.275 | 0.292 | 0.296 | 0.279 | 0.428 | 0.369 |

Table 10: The ICR for labels of each topic set using Krippendorff’s  $\alpha$ , Fleiss’  $\kappa$ , and Percentage Agreement  $Q_{agr}$

## E Evaluation 4: Ease of Labeling Collections

### Difficulty labeling document collections

This section presents all the correlations with  $Q_{aln}$  and  $Q_{dif}$ .

|                | LDA       |        | MetaLDA   |       | LDA       |        | MetaLDA   |       |
|----------------|-----------|--------|-----------|-------|-----------|--------|-----------|-------|
|                | $Q_{aln}$ |        | $Q_{aln}$ |       | $Q_{dif}$ |        | $Q_{dif}$ |       |
| All            | $\rho$    | $p$    | $\rho$    | $p$   | $\rho$    | $p$    | $\rho$    | $p$   |
| $C_{NPMI-ABC}$ | -0.0423   | 0.7486 | 0.141     | 0.283 | -0.1454   | 0.2676 | 0.1688    | 0.197 |
| $C_{NPMI-AP}$  | 0.3394    | 0.008  | 0.39      | 0.002 | 0.2224    | 0.0877 | 0.3694    | 0.004 |
| $C_{NPMI}$     | -0.2156   | 0.0981 | 0.148     | 0.259 | -0.1291   | 0.3257 | 0.2342    | 0.072 |
| $C_A$          | 0.123     | 0.3491 | 0.297     | 0.021 | -0.0672   | 0.61   | 0.2276    | 0.080 |
| $C_P$          | -0.1016   | 0.4397 | 0.226     | 0.082 | -0.0712   | 0.5887 | 0.1334    | 0.310 |
| $C_V$          | 0.2376    | 0.0676 | 0.147     | 0.264 | -0.079    | 0.5485 | 0.2321    | 0.074 |
| $C_{Umass}$    | -0.397    | 0.0017 | 0.029     | 0.827 | -0.1671   | 0.2018 | 0.0131    | 0.921 |
| Proportion     | 0.0717    | 0.5861 | 0.09      | 0.493 | 0.0037    | 0.9774 | 0.0536    | 0.684 |
| Effwords       | -0.2657   | 0.0402 | -0.239    | 0.066 | -0.1528   | 0.2438 | -0.285    | 0.027 |

  

|                | LDA       |        | MetaLDA   |       | LDA       |        | MetaLDA   |       |
|----------------|-----------|--------|-----------|-------|-----------|--------|-----------|-------|
|                | $Q_{aln}$ |        | $Q_{aln}$ |       | $Q_{dif}$ |        | $Q_{dif}$ |       |
| Top25pcnt      | $\rho$    | $p$    | $\rho$    | $p$   | $\rho$    | $p$    | $\rho$    | $p$   |
| $C_{NPMI-ABC}$ | 0.8245    | 0.0002 | 0.08      | 0.778 | 0.1643    | 0.5586 | -0.1956   | 0.485 |
| $C_{NPMI-AP}$  | 0.4838    | 0.0677 | 0.11      | 0.697 | 0.2918    | 0.2914 | -0.2999   | 0.278 |
| $C_{NPMI}$     | 0.5904    | 0.0205 | 0.347     | 0.206 | 0.0545    | 0.8469 | 0.2962    | 0.284 |
| $C_A$          | -0.3135   | 0.2552 | -0.014    | 0.961 | -0.3557   | 0.1932 | -0.3181   | 0.248 |
| $C_P$          | 0.568     | 0.0272 | 0.236     | 0.397 | 0.1609    | 0.5667 | 0.24      | 0.389 |
| $C_V$          | -0.3442   | 0.209  | 0.119     | 0.674 | -0.2046   | 0.4645 | 0.4085    | 0.131 |
| $C_{Umass}$    | -0.2858   | 0.3017 | -0.326    | 0.235 | -0.2283   | 0.4132 | -0.3965   | 0.143 |
| $D_{tp}$       | -0.0897   | 0.7505 | -0.592    | 0.02  | 0.2163    | 0.4388 | -0.5307   | 0.042 |
| $D_{ew}$       | -0.1391   | 0.621  | -0.776    | 0.001 | -0.1171   | 0.6778 | -0.7638   | 0.001 |

|                   | LDA       |        | MetaLDA   |       | LDA       |        | MetaLDA   |       |
|-------------------|-----------|--------|-----------|-------|-----------|--------|-----------|-------|
|                   | $Q_{aln}$ |        | $Q_{aln}$ |       | $Q_{dif}$ |        | $Q_{dif}$ |       |
| <b>Top50pcent</b> | $\rho$    | $p$    | $\rho$    | $p$   | $\rho$    | $p$    | $\rho$    | $p$   |
| $C_{NPMI-ABC}$    | 0.079     | 0.6781 | 0.213     | 0.259 | -0.0166   | 0.9308 | 0.0862    | 0.651 |
| $C_{NPMI-AP}$     | 0.2038    | 0.2801 | 0.045     | 0.815 | 0.2194    | 0.2441 | -0.1221   | 0.521 |
| $C_{NPMI}$        | 0.3603    | 0.0505 | 0.227     | 0.228 | 0.0184    | 0.9233 | 0.1811    | 0.338 |
| $C_A$             | -0.0986   | 0.6041 | 0.12      | 0.528 | -0.1881   | 0.3194 | 0.0143    | 0.940 |
| $C_P$             | -0.0628   | 0.7415 | 0.342     | 0.065 | -0.1011   | 0.5949 | 0.221     | 0.241 |
| $C_V$             | 0.0694    | 0.7157 | -0.217    | 0.248 | -0.1216   | 0.5223 | 0.019     | 0.921 |
| $C_{Umass}$       | -0.4059   | 0.026  | -0.023    | 0.904 | -0.3119   | 0.0933 | 0.1051    | 0.581 |
| $D_{tp}$          | 0.2278    | 0.2261 | -0.338    | 0.068 | 0.0306    | 0.8726 | -0.256    | 0.172 |
| $D_{ew}$          | -0.2545   | 0.1748 | -0.65     | 0     | -0.2132   | 0.2581 | -0.6298   | 0.000 |
|                   | LDA       |        | MetaLDA   |       | LDA       |        | MetaLDA   |       |
|                   | $Q_{aln}$ |        | $Q_{aln}$ |       | $Q_{dif}$ |        | $Q_{dif}$ |       |
| <b>Bot15pcent</b> | $\rho$    | $p$    | $\rho$    | $p$   | $\rho$    | $p$    | $\rho$    | $p$   |
| $C_{NPMI-ABC}$    | 0.5317    | 0.1407 | 0.037     | 0.924 | 0.8165    | 0.0072 | -0.2282   | 0.555 |
| $C_{NPMI-AP}$     | 0.1581    | 0.6845 | -0.091    | 0.815 | 0.1862    | 0.6315 | -0.0797   | 0.839 |
| $C_{NPMI}$        | -0.0851   | 0.8276 | 0         | 1     | 0.2294    | 0.5527 | -0.0913   | 0.815 |
| $C_A$             | 0.0769    | 0.844  | -0.159    | 0.682 | -0.1491   | 0.7019 | -0.01     | 0.980 |
| $C_P$             | -0.4473   | 0.2274 | -0.169    | 0.663 | -0.1101   | 0.778  | 0         | 1.000 |
| $C_V$             | 0.2946    | 0.4416 | 0.356     | 0.347 | -0.2092   | 0.5891 | 0.2926    | 0.445 |
| $C_{Umass}$       | 0.4873    | 0.1833 | -0.186    | 0.631 | -0.3119   | 0.0933 | 0         | 1.000 |
| $D_{tp}$          | -0.523    | 0.1486 | 0.523     | 0.149 | -0.3486   | 0.3579 | 0.2739    | 0.476 |
| $D_{ew}$          | 0.2305    | 0.5507 | 0.693     | 0.039 | 0.3578    | 0.3444 | 0.2635    | 0.493 |
|                   | LDA       |        | MetaLDA   |       | LDA       |        | MetaLDA   |       |
|                   | $Q_{aln}$ |        | $Q_{aln}$ |       | $Q_{dif}$ |        | $Q_{dif}$ |       |
| <b>Bot10pcent</b> | $\rho$    | $p$    | $\rho$    | $p$   | $\rho$    | $p$    | $\rho$    | $p$   |
| $C_{NPMI-ABC}$    | 0.6377    | 0.1731 | 0.463     | 0.355 | 0.6768    | 0.1398 | -0.0926   | 0.862 |
| $C_{NPMI-AP}$     | -0.0304   | 0.9545 | 0         | 1     | -0.206    | 0.6954 | 0.1014    | 0.848 |
| $C_{NPMI}$        | -0.3189   | 0.5379 | 0.44      | 0.383 | -0.0304   | 0.9545 | 0.8783    | 0.021 |
| $C_A$             | 0.239     | 0.6483 | 0.101     | 0.848 | -0.2      | 0.6059 | 0         | 1.000 |
| $C_P$             | 0.7537    | 0.0835 | -0.44     | 0.383 | 0.8024    | 0.0547 | 0.0976    | 0.854 |
| $C_V$             | 0.1543    | 0.7704 | 0.741     | 0.092 | -0.3719   | 0.4679 | 0.7407    | 0.092 |
| $C_{Umass}$       | 0.7537    | 0.0835 | -0.216    | 0.681 | 0.8024    | 0.0547 | 0.414     | 0.414 |
| $D_{tp}$          | -0.8452   | 0.0341 | 0.828     | 0.042 | -0.8452   | 0.0341 | 0.6831    | 0.135 |
| $D_{ew}$          | -0.0883   | 0.8679 | 0.82      | 0.046 | -0.4414   | 0.3809 | 0.4938    | 0.320 |

## F Examples

Examples of poorly aligned topics are shown in Table 11.

| Topic Label    | Collection Label             | Topic                                                                          | NPMI   |
|----------------|------------------------------|--------------------------------------------------------------------------------|--------|
| Gun Control    | Foreign interference act     | law, bill, power, gun, democracy, control, freedom, rule, protect, legislation | 0.0734 |
| Cost of Living | Politician's rental property | house, free, property, home, rent, pay, live, buy, move, money                 | 0.0814 |
| Addiction help | Legalization of drugs        | health, drug, care, test, medical, doctor, access, alcohol, live, death        | 0.0702 |

Table 11: Topics which did not align well with the document collection despite having a high coherence.
